# Supplementary material for: Burden of Atopic Dermatitis in the United States: Analysis of Healthcare Claims Data in the Commercial, Medicare, and Medi-Cal Databases
Source: PubMed Central journal article supplement — Adv Ther. 2017 Jul 13;34(8):1989–2006. doi: 10.1007/s12325-017-0582-z (PMC5565673; doi:10.1007/s12325-017-0582-z), 2017-07-13
Supplement: 12325_2017_582_MOESM1_ESM.pdf [file 12325_2017_582_MOESM1_ESM.pdf]

**Supplementary Table 1. Comorbidities in matched atopic dermatitis (AD) patients and non-AD controls**

|                                         | Commercial                 |                                |          | Medicare                   |                                |          | Medi-Cal                  |                               |          |
|-----------------------------------------|----------------------------|--------------------------------|----------|----------------------------|--------------------------------|----------|---------------------------|-------------------------------|----------|
|                                         | AD<br>( <i>n</i> = 83,106) | Non-AD<br>( <i>n</i> = 83,106) | <i>P</i> | AD<br>( <i>n</i> = 31,060) | Non-AD<br>( <i>n</i> = 31,060) | <i>P</i> | AD<br>( <i>n</i> = 5,550) | Non-AD<br>( <i>n</i> = 5,550) | <i>P</i> |
| Deyo-modified CCI score, mean (SD)      | 0.46 (1.10)                | 0.34 (0.98)                    | <0.0001  | 1.92 (2.21)                | 1.75 (2.21)                    | <0.0001  | 0.78 (1.48)               | 0.52 (1.37)                   | <0.0001  |
| CCI comorbid conditions, <i>n</i> (%)   |                            |                                |          |                            |                                |          |                           |                               |          |
| Myocardial infarction                   | 441 (0.53)                 | 425 (0.51)                     | 0.5857   | 1,427 (4.59)               | 1,324 (4.26)                   | 0.0446   | 35 (0.63)                 | 34 (0.61)                     | 0.9039   |
| Congestive heart failure                | 687 (0.83)                 | 609 (0.73)                     | 0.0296   | 3,232 (10.41)              | 3,001 (9.66)                   | 0.002    | 122 (2.20)                | 93 (1.68)                     | 0.0458   |
| Peripheral vascular disease             | 913 (1.10)                 | 712 (0.86)                     | <0.0001  | 3,319 (10.69)              | 2,648 (8.53)                   | <0.0001  | 71 (1.28)                 | 40 (0.72)                     | 0.0031   |
| Dementia                                | 86 (0.10)                  | 64 (0.08)                      | 0.0723   | 969 (3.12)                 | 951 (3.06)                     | 0.6765   | 15 (0.27)                 | 16 (0.29)                     | 0.8573   |
| Cerebrovascular disease                 | 1,814 (2.18)               | 1,418 (1.71)                   | <0.0001  | 4,301 (13.85)              | 3,777 (12.16)                  | <0.0001  | 170 (3.06)                | 124 (2.23)                    | 0.0065   |
| Rheumatologic/connective tissue disease | 1,402 (1.69)               | 889 (1.07)                     | <0.0001  | 1,233 (3.97)               | 932 (3.00)                     | <0.0001  | 129 (2.32)                | 73 (1.32)                     | <0.0001  |
| Peptic ulcer disease                    | 322 (0.39)                 | 243 (0.29)                     | 0.0009   | 388 (1.25)                 | 319 (1.03)                     | 0.0091   | 102 (1.84)                | 38 (0.68)                     | <0.0001  |
| Mild liver disease                      | 256 (0.31)                 | 157 (0.19)                     | <0.0001  | 275 (0.89)                 | 210 (0.68)                     | 0.003    | 66 (1.19)                 | 39 (0.70)                     | 0.0081   |
| Hemiplegia or paraplegia                | 232 (0.28)                 | 190 (0.23)                     | 0.148    | 396 (1.27)                 | 398 (1.28)                     | 0.9598   | 38 (0.68)                 | 21 (0.38)                     | 0.0265   |

|                                  |                |              |         |                |               |         |               |             |         |
|----------------------------------|----------------|--------------|---------|----------------|---------------|---------|---------------|-------------|---------|
| Moderate or severe renal disease | 2,410 (2.90)   | 1,874 (2.25) | <0.0001 | 10,904 (35.11) | 9,682 (31.17) | <0.0001 | 131 (2.36)    | 87 (1.57)   | 0.0026  |
| Diabetes                         | 6,560 (7.89)   | 5,846 (7.03) | <0.0001 | 8,737 (28.13)  | 8,526 (27.45) | 0.0588  | 843 (15.19)   | 589 (10.61) | <0.0001 |
| Any tumor (or other malignancy)  | 5,856 (7.05)   | 5,024 (6.05) | <0.0001 | 7,772 (25.02)  | 7,390 (23.79) | 0.0192  | 182 (3.28)    | 160 (2.88)  | 0.2269  |
| Moderate/severe liver disease    | 327 (0.39)     | 201 (0.24)   | 0.0015  | 381 (1.23)     | 249 (0.80)    | 0.0024  | 28 (0.50)     | 20 (0.36)   | 0.2472  |
| Metastatic solid tumor           | 1,866 (2.25)   | 1,788 (2.15) | 0.5977  | 2,358 (7.59)   | 3,072 (9.89)  | <0.0001 | 22 (0.40)     | 36 (0.65)   | 0.0653  |
| Diabetes + complications         | 2,420 (2.91)   | 1,954 (2.35) | <0.0001 | 6,498 (20.92)  | 6,038 (19.44) | 0.0022  | 199 (3.59)    | 145 (2.61)  | 0.0031  |
| AIDS                             | 1,692 (2.04)   | 936 (1.13)   | <0.0001 | 150 (0.48)     | 114 (0.37)    | 0.3655  | 45 (0.81)     | 25 (0.45)   | 0.0165  |
| Chronic pulmonary disease        | 11,282 (13.58) | 5,803 (6.98) | <0.0001 | 7,358 (23.69)  | 5,878 (18.92) | <0.0001 | 1,186 (21.37) | 562 (10.13) | <0.0001 |

CCI/Charlson comorbidity index

**Supplementary Table 2. Comorbidities in atopic dermatitis patients stratified by disease severity**

|                                         | Commercial                      |                                |          | Medicare                        |                                |          | Medi-Cal                       |                               |          |
|-----------------------------------------|---------------------------------|--------------------------------|----------|---------------------------------|--------------------------------|----------|--------------------------------|-------------------------------|----------|
|                                         | Higher severity<br>(n = 29,640) | Lower severity<br>(n = 53,466) | <i>P</i> | Higher severity<br>(n = 12,546) | Lower severity<br>(n = 18,514) | <i>P</i> | Higher severity<br>(n = 1,198) | Lower severity<br>(n = 4,352) | <i>P</i> |
| Deyo-modified CCI score, mean (SD)      | 0.63 (1.28)                     | 0.37 (0.97)                    | <0.0001  | 2.18 (2.33)                     | 1.75 (2.10)                    | <0.0001  | 1.23 (1.77)                    | 0.66 (1.36)                   | <0.0001  |
| CCI comorbid conditions, <i>n</i> (%)   |                                 |                                |          |                                 |                                |          |                                |                               |          |
| Myocardial infarction                   | 217 (0.73)                      | 224 (0.42)                     | <0.0001  | 609 (4.85)                      | 818 (4.42)                     | 0.0718   | 14 (1.17)                      | 21 (0.48)                     | 0.0079   |
| Congestive heart failure                | 357 (1.20)                      | 330 (0.62)                     | <0.0001  | 1,566 (12.48)                   | 1,666 (9.00)                   | <0.0001  | 48 (4.01)                      | 74 (1.70)                     | <0.0001  |
| Peripheral vascular disease             | 429 (1.45)                      | 484 (0.91)                     | <0.0001  | 1,476 (11.76)                   | 1,843 (9.95)                   | <0.0001  | 26 (2.17)                      | 45 (1.03)                     | 0.0019   |
| Dementia                                | 25 (0.08)                       | 61 (0.11)                      | 0.2014   | 312 (2.49)                      | 657 (3.55)                     | <0.0001  | 2 (0.17)                       | 13 (0.30)                     | 0.4366   |
| Cerebrovascular disease                 | 884 (2.98)                      | 930 (1.74)                     | <0.0001  | 1,892 (15.08)                   | 2,409 (13.01)                  | <0.0001  | 61 (5.09)                      | 109 (2.50)                    | <0.0001  |
| Rheumatologic/connective tissue disease | 961 (3.24)                      | 441 (0.82)                     | <0.0001  | 848 (6.76)                      | 385 (2.08)                     | <0.0001  | 74 (6.18)                      | 55 (1.26)                     | <0.0001  |
| Peptic ulcer disease                    | 145 (0.49)                      | 177 (0.33)                     | 0.0004   | 176 (1.40)                      | 212 (1.15)                     | 0.0448   | 37 (3.09)                      | 65 (1.49)                     | 0.0003   |
| Mild liver disease                      | 131 (0.44)                      | 125 (0.23)                     | <0.0001  | 121 (0.96)                      | 154 (0.83)                     | 0.2208   | 22 (1.84)                      | 44 (1.01)                     | 0.0196   |
| Hemiplegia or paraplegia                | 100 (0.34)                      | 132 (0.25)                     | 0.0942   | 156 (1.24)                      | 240 (1.30)                     | 0.7738   | 17 (1.42)                      | 21 (0.48)                     | 0.0005   |
| Moderate or severe renal disease        | 1,182 (3.99)                    | 1,228 (2.30)                   | <0.0001  | 4,682 (37.32)                   | 6,222 (33.61)                  | <0.0001  | 48 (4.01)                      | 83 (1.91)                     | <0.0001  |

|                               |               |              |         |               |               |         |             |             |         |
|-------------------------------|---------------|--------------|---------|---------------|---------------|---------|-------------|-------------|---------|
| Diabetes                      | 2,723 (9.19)  | 3,837 (7.18) | <0.0001 | 3,637 (28.99) | 5,100 (27.55) | 0.0055  | 231 (19.28) | 612 (14.06) | <0.0001 |
| Any tumor (other malignancy)  | 2,624 (8.85)  | 3,232 (6.04) | <0.0001 | 3,480 (27.74) | 4,292 (23.18) | <0.0001 | 55 (4.59)   | 127 (2.92)  | 0.0040  |
| Moderate/severe liver disease | 144 (0.49)    | 183 (0.34)   | 0.0679  | 174 (1.69)    | 207 (1.12)    | 0.2246  | 8 (0.67)    | 20 (0.46)   | 0.3677  |
| Metastatic solid tumor        | 1,146 (3.87)  | 720 (1.35)   | <0.0001 | 1,350 (10.76) | 1,008 (5.44)  | <0.0001 | 8 (0.67)    | 14 (0.32)   | 0.0914  |
| Diabetes + complications      | 1,044 (3.52)  | 1,376 (2.57) | <0.0001 | 2,766 (22.05) | 3,732 (20.16) | 0.0076  | 66 (5.51)   | 133 (3.06)  | <0.0001 |
| AIDS                          | 612 (2.06)    | 1,080 (2.02) | 0.8593  | 42 (0.33)     | 108 (0.58)    | 0.2065  | 11 (0.92)   | 34 (0.78)   | 0.6398  |
| Chronic pulmonary disease     | 6,042 (20.38) | 5,240 (9.80) | <0.0001 | 4,040 (32.20) | 3,318 (17.92) | <0.0001 | 447 (37.31) | 739 (16.98) | <0.0001 |

AD patients were stratified by disease severity using treatment as a surrogate measure of severity. The higher disease severity subgroup comprised patients who had at least one medical or pharmacy claim for systemic corticosteroids, systemic immunosuppressants, or phototherapy during the 12-month follow-up period. The lower disease severity subgroup comprised patients who did not have a claim for any of these treatments or had no treatment during the 12-month follow-up period.

**Supplementary Fig. 1** Adjusted overall healthcare resource utilization in atopic dermatitis (AD) patients and matched non-AD controls in **a** Commercial, **b** Medicare, and **c** Medi-Cal populations

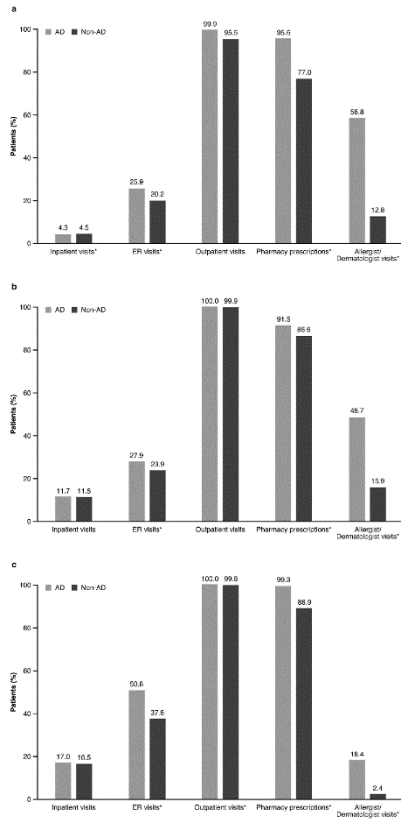

\* $P < 0.05$ . Variables included in the generalized linear model: age, gender, race, non-AD related comorbidities, and region (Commercial and Medicare only). AD atopic dermatitis; ER emergency room

**Supplementary Fig. 2** Adjusted overall healthcare resource utilization stratified by atopic dermatitis disease severity in **a** Commercial, **b** Medicare, and **c** Medi-Cal populations

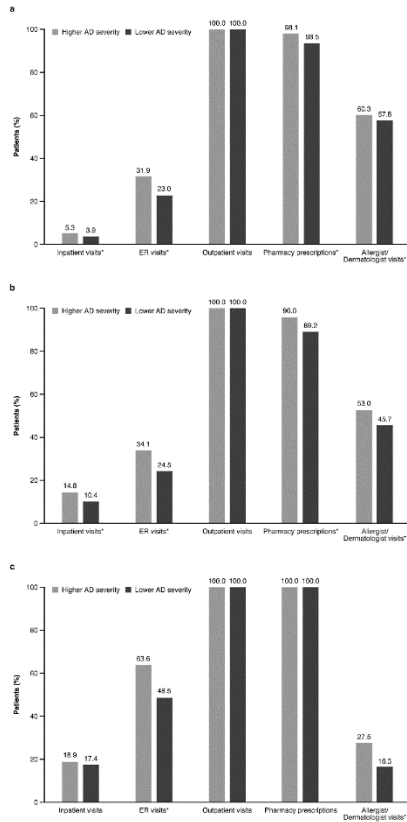

\* $P < 0.05$ . Variables included in the generalized linear model: age, gender, race, non-AD related comorbidities, and region (Commercial and Medicare only). AD atopic dermatitis; ER emergency room
